# Supplementary material for: Self-Assembled Peptide Habitats to Model Tumor Metastasis
Source: MDPI journal article supplement (doi:10.3390/gels8060332), 2022-05-25
Supplement: s1 [file s1]

# Self-Assembled Peptide Habitats to Model Tumor Metastasis

Noora Al Balushi <sup>1</sup>, Mitchell Boyd-Moss <sup>2,3,4</sup>, Rasika M. Samarasinghe <sup>3,5</sup>, Aaqil Rifai <sup>2,3,5</sup>, Stephanie J. Franks <sup>6</sup>, Kate Firipis <sup>2,4</sup>, Benjamin M. Long <sup>7</sup>, Ian A. Darby <sup>1</sup>, David R. Nisbet <sup>6,8,9,10</sup>, Dodie Pouniotis <sup>1,\*</sup> and Richard J. Williams <sup>2,3,4,5,\*</sup>

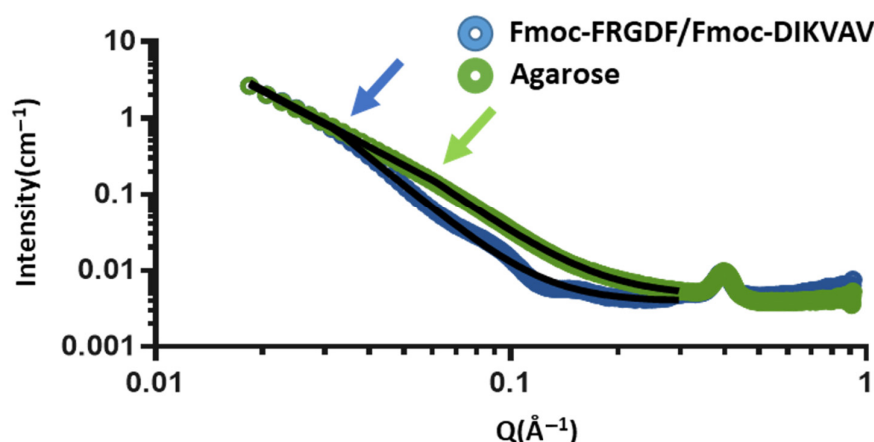

**Figure S1.** Fitting of scattering curves using a two-power model to determine mesh size (arrows indicate the power intercept).

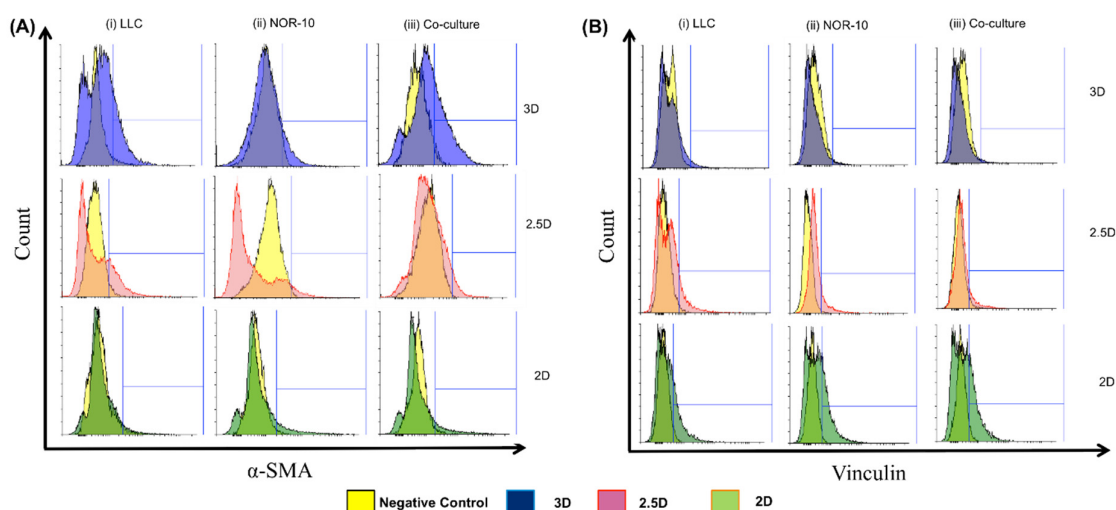

**Figure S2.** Flow cytometry of (A)  $\alpha$ -SMA and (B) vinculin expression measured in (i) LLC, (ii) NOR-10 and (iii) LLC+NOR-10 co-culture after 72 hours encapsulation within Fmoc-SAP hydrogel (3D) compared to 2.5D spheroids in media and 2D cell culture.

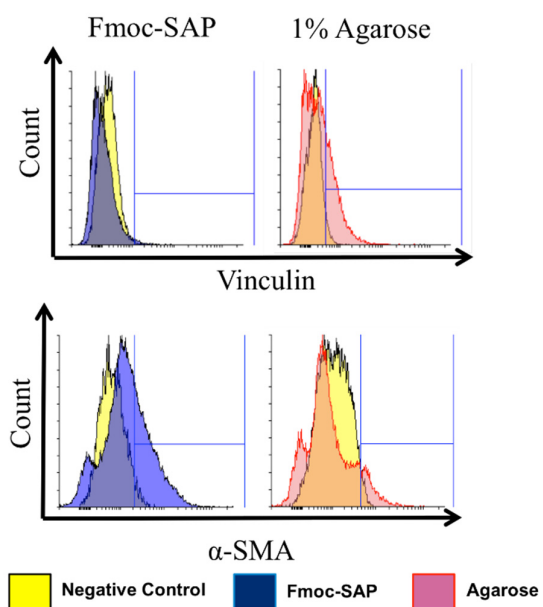

**Figure S3.** Flow cytometry analysis of vinculin and  $\alpha$ -SMA expression in co-culture spheroids within Fmoc-SAP hydrogels and 1% agarose.
